# Supplementary material for: Investigations into the use of multi-species measurements for source apportionment of the Indianapolis fossil fuel CO2 signal
Source: Oxford University Press journal article supplement (doi:10.1525/elementa.131), 2018-01-01
Supplement: elementa-6-131-s5.pdf [file elementa-6-131-s5.pdf]

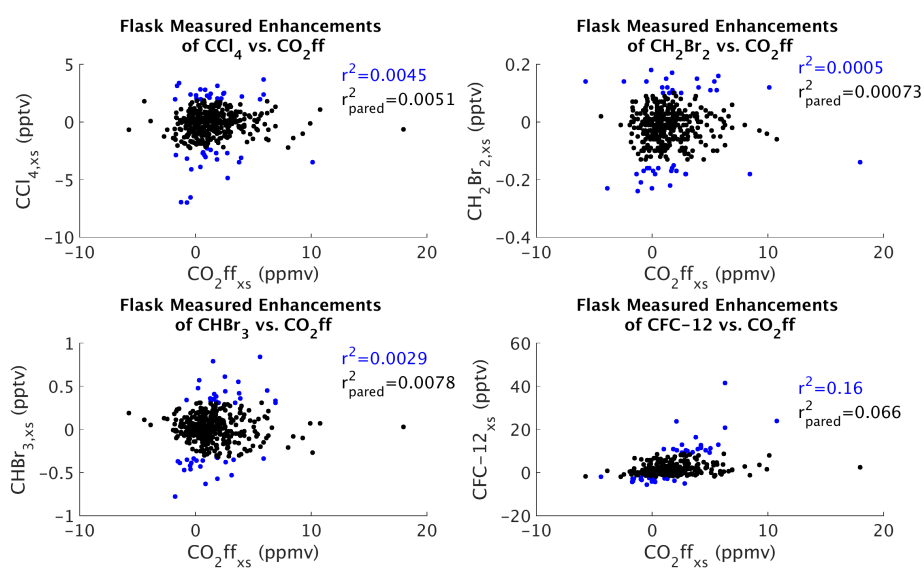

**Figure S5. Scatter plots for the raw data from several measured flask species against  $CO_2ff$  with the corresponding  $r^2$  value.  $r^2_{pared}$  was computed by removing the top and bottom 5% of values from the non- $CO_2ff$  species.**
